# Supplementary material for: Accelerated Formation of 2D Ruddlesden—Popper Perovskite Thin Films by Lewis Bases for High Efficiency Solar Cell Applications
Source: MDPI journal article supplement (doi:10.3390/nano12111816), 2022-05-26
Supplement: s1 [file s1]

## Supporting information

# Accelerated Formation of 2D Ruddlesden–Popper Perovskite Thin Films by Lewis Bases for High Efficiency Solar Cell Applications

Swathi M. Gowdru <sup>1,†</sup>, Jou-Chun Lin <sup>1,†</sup>, Szu-Tan Wang <sup>1,†</sup>, Yi-Chia Chen <sup>1</sup>, Kuan-Chang Wu <sup>1</sup>, Cheng-Nan Jiang <sup>1</sup>, Yu-Dian Chen <sup>1</sup>, Shao-Sian Li <sup>2,\*</sup>, Yuan Jay Chang <sup>1</sup> and Di-Yan Wang <sup>1,\*</sup>

<sup>1</sup> Department of Chemistry, Tunghai University, Taichung 40704, Taiwan; swathimb3@gmail.com (S.M.G.); jouchun1908@thu.edu.tw (J.-C.L.); ybbis1124@yahoo.com.tw (S.-T.W.); yichia899@gmail.com (Y.-C.C.); leo19981009leo@gmail.com (K.-C.W.); jiangjengnan@gmail.com (C.-N.J.); 510087d@gmail.com (Y.-D.C.); jaychang@thu.edu.tw (Y.J.C.)

<sup>2</sup> Department of Materials and Mineral Resources Engineering, Institute of Materials Science and Engineering, National Taipei University of Technology, Taipei 10608, Taiwan

\* Correspondence: ssl@ntut.edu.tw (S.-S.L.); diyanwang@thu.edu.tw (D.-Y.W.)

† These authors contributed equally to this work.

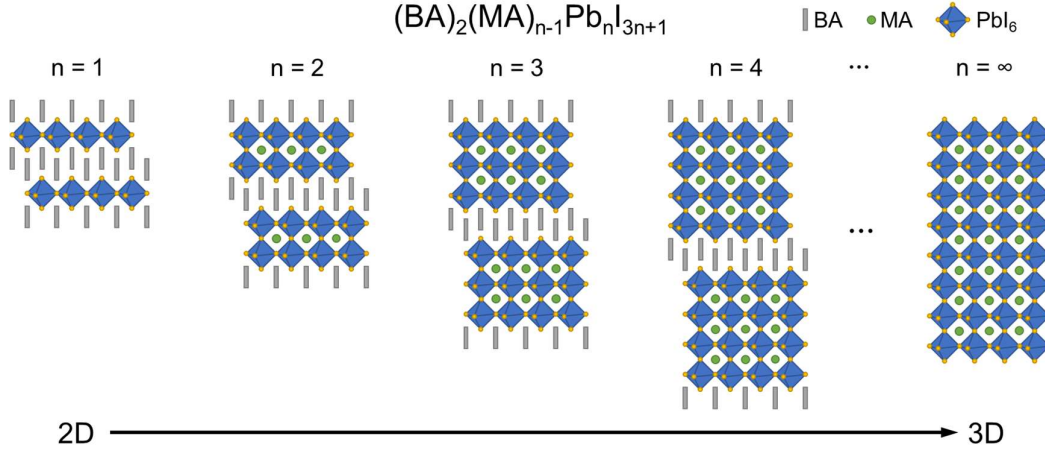

**Figure S1.** The schematic illustration of chemical structure of  $(\text{BA})_2(\text{MA})_{n-1}\text{Pb}_n\text{I}_{3n+1}$  2D perovskite unit cell with different  $n$  value.

The TRPL spectra of pristine and urea treated films were fitted by a bi-exponential decay function as shown below:

$$A(t) = A_0 + A_1 e^{-\frac{t}{\tau_1}} + A_2 e^{-\frac{t}{\tau_2}} \quad (1)$$

Where  $A_0$  is a constant for the baseline offset,  $A_1$  and  $A_2$  are the amplitudes of the TRPL decay,  $\tau_1$  is the fast decay time responsible for interface (trap-assisted) recombination, and  $\tau_2$  is the slow decay time responsible for bulk (carrier radiative) recombination. The average lifetimes ( $\tau_{ave}$ ) were estimated with the function as:

$$\tau_{ave} = \frac{A_1 \tau_1^2 + A_2 \tau_2^2}{A_1 \tau_1 + A_2 \tau_2} \quad (2)$$

The obtained results of TRPL data were listed in the table below. The results showed the obtained pristine films exhibit a short decay time ( $\tau_1$ ) of 2.32 ns accounting for 88.5%, a long decay time ( $\tau_2$ ) of 6.38 ns accounting for 11.5%, and average lifetime ( $\tau_{ave}$ ) of 3.39 ns. In comparison, the TRPL fitting results of urea teated films show  $\tau_1$  of 1.47 ns accounting for 94.4%,  $\tau_2$  of 4.68 ns accounting for 5.56%, and average lifetime ( $\tau_{ave}$ ) of 1.98 ns. The increament of interface recombination indicated that urea treatment can improving the film quality.

**Table S1.** The PL life time was calculated from TRPL spectra of pristine and urea treated films which was fitted by a bi-exponential decay function.

|              | $\lambda_{Em}$ [nm] | $A_1$ [%] | $\tau_1$ [ns] | $A_2$ [%] | $\tau_2$ [ns] | $\tau_{ave}$ [ns] |
|--------------|---------------------|-----------|---------------|-----------|---------------|-------------------|
| with urea    | 675                 | 94.4      | 1.47          | 5.56      | 4.68          | 1.98              |
| without urea | 725                 | 88.5      | 2.32          | 11.5      | 6.38          | 3.39              |

**Table S2.** The calculation of crystallite size of 2D perovskite materials with/without urea treatment by the Scherrer equation from XRD spectra in Figure 2 (a).

|                     | Plane | 2 Theta<br>(deg.) | d-spacing<br>(Å) | Intensity ratio of<br>(111)/(202) | Crystallite size<br>(nm) |
|---------------------|-------|-------------------|------------------|-----------------------------------|--------------------------|
| <b>Without urea</b> | (111) | 14.1              | 6.35             | 0.16                              | 39.4                     |
|                     | (202) | 28.5              | 3.12             |                                   |                          |
| <b>With urea</b>    | (111) | 14.1              | 6.35             | 1.11                              | 42.1                     |
|                     | (202) | 28.5              | 3.12             |                                   |                          |

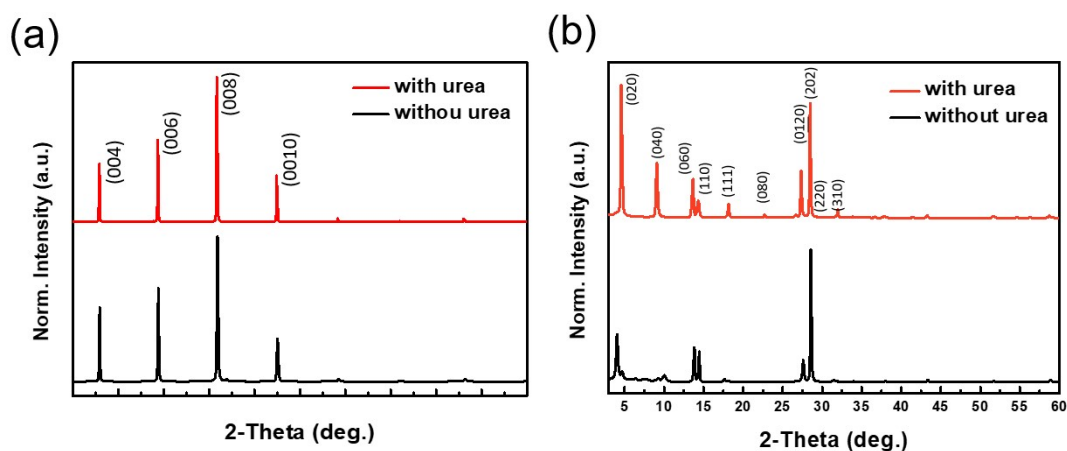

**Figure S2.** XRD features of the pristine film and urea treated film prepared from a precursor solution of (a)  $(\text{BA})_2\text{PbI}_4$  and (b)  $(\text{BA})_2(\text{MA})_1\text{Pb}_2\text{I}_7$ .

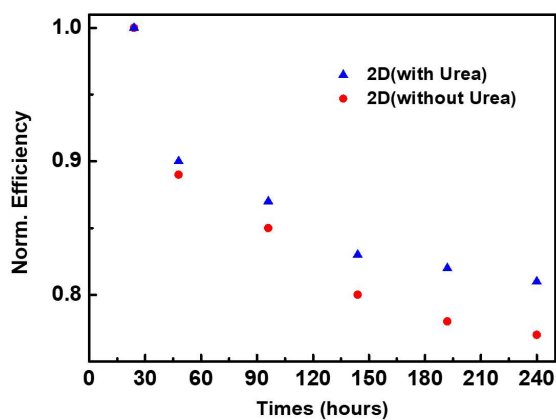

**Figure S3.** The photo conversion efficiency (PCE) of the device were tracked over 240 hours under ambient condition (the temperature of  $\sim 25^\circ\text{C}$  and humidity of  $\sim 60\text{ RH}\%$ ).

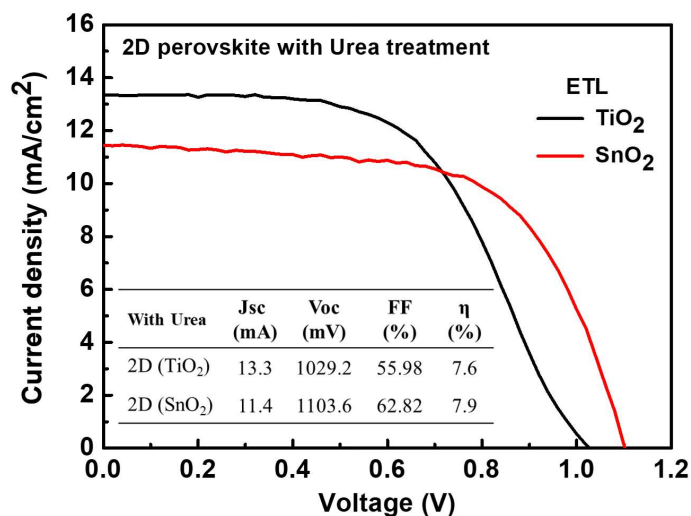

**Figure S4.** J–V curves of 2D RP PSCs with using TiO<sub>2</sub> and SnO<sub>2</sub> as ETL under simulated AM 1.5G illumination (100 mW/cm<sup>2</sup>).

To find out the effect of ETL on the PCE of 2D perovskite solar cell device, TiO<sub>2</sub> film was deposited on FTO in comparison with SnO<sub>2</sub> on ITO. Here, SnO<sub>2</sub> was used as ETL over its counter part of TiO<sub>2</sub> due to the superior physical and chemical properties such as high electron mobility, high conductivity and less photo-activity to provide better stability under light illumination. However, the conduction band minimum (CBM) of SnO<sub>2</sub> is slightly deeper than CBM of TiO<sub>2</sub>, which might reduce the value of Voc when 2D ruddleson popper perovskite was used as light absorber. Chemical modification of CPTA was applied onto SnO<sub>2</sub> to create dipole between ETL and perovskite layer to enlarge the built-in potential at SnO<sub>2</sub>/CPTA interface. This resulted in a better energetic cascade structure for photo-generated electrons transferring to the ITO and therefore sustained a better electron potential and higher Voc as shown in **Figure S4**. The modification also promoted the ability of electron transfer and suppress recombination, led to a higher solar cell performance. By contrast, there is only physical contact between TiO<sub>2</sub> and 2D perovskite layer (no interfacial dipole), significant charge recombination could not be prohibited and giving to a lower Voc. However, the rougher surface of TiO<sub>2</sub> ETL provide higher interface area for charge separation than SnO<sub>2</sub> ETL, and increase the photocurrent (Jsc).

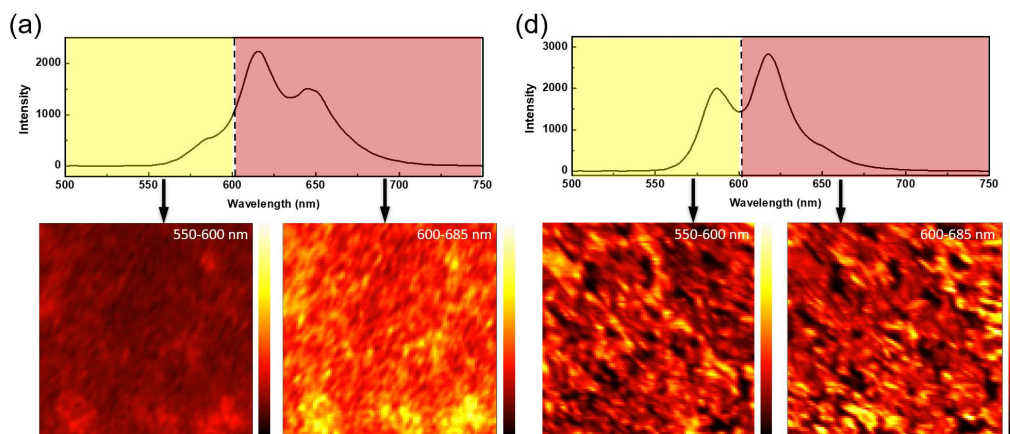

**Figure S5.** 2D RP perovskite film with mixed phases ( $n=1, 2$  and  $3$ ) was prepared by a precursor of urea treated  $(\text{BA})_2(\text{MA})_1\text{Pb}_2\text{I}_7$  solution with using spin coating process. 2D intensity mapping of the PL spectra for a  $5\text{ }\mu\text{m} \times 5\text{ }\mu\text{m}$  area of (a) the pristine film and (b) the urea treated film. The two wavelength ranges (one is  $550\text{ nm}$  to  $600\text{ nm}$  and the other is  $600\text{ nm}$  to  $685\text{ nm}$ ) of PL mapping were selected. According to the PL mapping, we found that with urea treatment, the 2D RP film with mixed  $n$  values (including  $n=1, 2$  and  $3$ ) did form successfully over a large area compared to the pristine films, which tended to form 3D phases.
